# Supplementary material
Source: PubMed Central journal article supplement (PMC3048064)
Supplement: NIHMS158219-supplement-01.pdf [file NIHMS158219-supplement-01.pdf]

## Supplemental Data

### Context-Dependent Transformation of Adult

### Pancreatic Cells by Oncogenic K-Ras

Sharon Y. Gidekel Friedlander, Gerald C. Chu, Eric L. Snyder, Nomedra Girnius, Gregory Dibelius, Denise Crowley, Eliza Vasile, Ronald A. DePinho, and Tyler Jacks

#### Supplemental Figures

**Figure S1.** Further characterization of *Pdx1CreER<sup>TM</sup>;LSL-Kras<sup>G12D</sup>* compound mice.

**A-B:** Immunohistochemical staining for the  $\alpha$  cell marker Glucagon (A) and PP cell marker PYY (B). Note positive staining in mPanINs, ductal metaplasia and in non-neoplastic islet (orange, black and red arrows, respectively).

**C-D:** H&E staining of pancreata obtained from mice 120 days after TM injection. Note developed ductal structures in the islets (arrows in C), exocrine hypoplasia, mPanINs (arrows in D), ductal metaplasia (arrowhead in D) and strong stromal reaction.

**E-F:** H&E staining of pancreata derived from mice treated with either TM dissolved in corn oil by intraperitoneal injection (E) or TM dissolved in carboxymethyl cellulose by oral gavage (F). Note peritonitis in E and mPanIN formation in F (arrows).

Bars: A, B: 50  $\mu$ m; C-E: 100 $\mu$ m; F: 200 $\mu$ m.

**Figure S2.** *Kras<sup>G12D</sup>* activation in *pro-CPA*-positive cells of the adult pancreas results in mPanIN and PDAC development at low frequency.

**A:** X-gal staining of a pancreas derived from a TM-treated *proCPA1CreER<sup>T2</sup>;LSL-Kras<sup>G12D</sup>;LSL-LacZ* compound mouse shows mPanIN formation (arrow).

**B:** H&E-stained section of metastatic PDAC (m) in the liver (l) of a *proCPA1CreER<sup>T2</sup>;LSL-Kras<sup>G12D</sup>;Trp53<sup>flox/flox</sup>* compound mouse.

Bars: A: 100  $\mu\text{m}$ ; B: 200 $\mu\text{m}$ .

**Figure S3.**  $Kras^{G12D}$  activation in combination with p53 or Ink4A/Arf loss in *pro-CPA*-positive and *insulin*-positive cells of the adult pancreas results in mPanIN3 and PDAC development after caerulein treatment.

**A-B:** H&E-stained sections of mPanIN3 (arrow in A) and PDAC (B) in caerulein- & TM-treated *proCPA1CreER<sup>T2</sup>;LSL-Kras<sup>G12D</sup>;Trp53<sup>flox/flox</sup>* compound mice.

**C:** H&E-stained section of PDAC invading the spleen (S) of a TM- & caerulein-treated *proCPA1CreER<sup>T2</sup>;LSL-Kras<sup>G12D</sup>;Ink4A/Arf<sup>flox/flox</sup>* compound mouse.

**D:** H&E-stained section of PDAC arising in a caerulein- & TM-treated *RipCreER<sup>TM</sup>;LSL-Kras<sup>G12D</sup>; Trp53<sup>flox/flox</sup>;LSL-LacZ* compound mouse. The tumor exhibits anaplasia with giant cells (arrows).

Bars: 200  $\mu\text{m}$ .

A

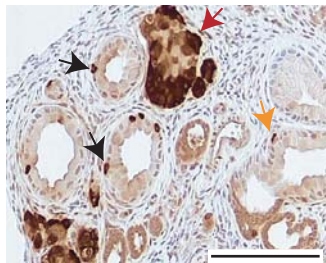

B

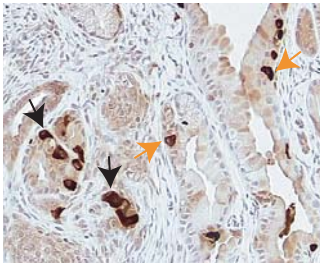

C

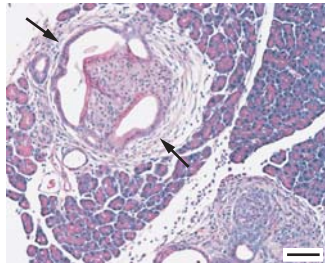

D

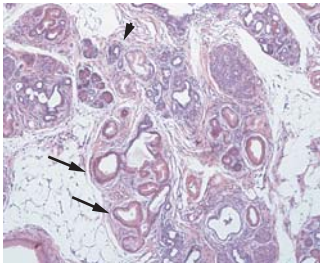

E

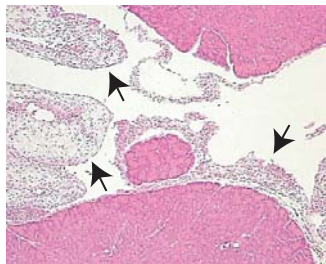

F

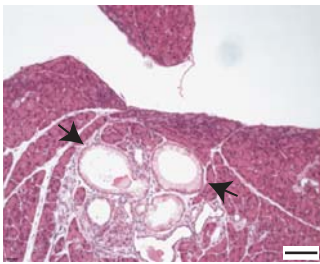

A

*proCPACreER<sup>T2</sup>;LSL-Kras<sup>G12D</sup>;  
LSL- LacZ*

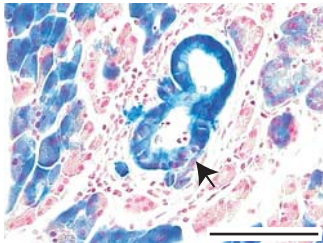

B

*proCPACreER<sup>T2</sup>; LSL-Kras<sup>G12D</sup>;  
Trp53<sup>flox/flox</sup>*

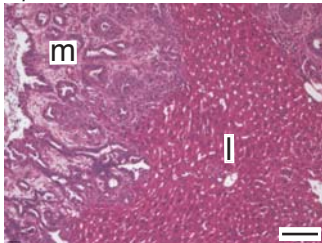

A

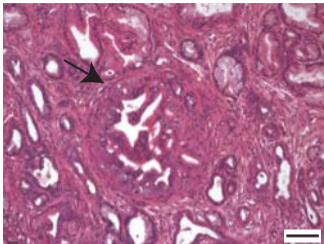

B

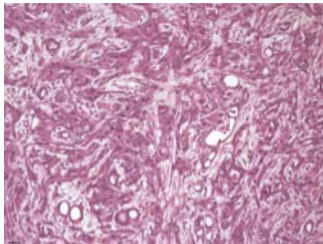

C

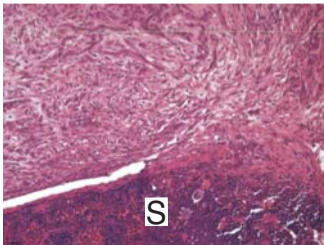

D

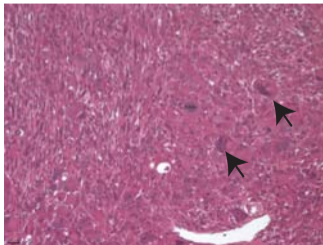

**Table S1: Quantification of the recombination efficiency and specificity of the different Cre strains used in the study. Mice were treated with Tamoxifen (TM) by intraperitoneal injections of 9mg/40g body weight in corn oil, one every other day for a total of 3 injections. Animals were at the age of 21-30 day old at the time of first injection and sacrificed 14 days after the last TM injection. Analysis was performed on X-gal stained sections of pancreata derived from three mice of each genotype.**

| Genotype                                | % Recombined acinar cells per tissue section by analyzed areas                       | Average % recombination of acinar cells per tissue section | Number of recombined islets/ total number of islets per tissue section | % Recombination per analyzed islet                                                      | Average % recombination per islet | Number of recombined ducts/ total number of ducts per tissue section | % Recombination per analyzed duct                                                                                            | Average % recombination per ducts | # of recombined single cells outside the islets per tissue section |
|-----------------------------------------|--------------------------------------------------------------------------------------|------------------------------------------------------------|------------------------------------------------------------------------|-----------------------------------------------------------------------------------------|-----------------------------------|----------------------------------------------------------------------|------------------------------------------------------------------------------------------------------------------------------|-----------------------------------|--------------------------------------------------------------------|
| <i>RipCreER<sup>TM</sup>; LSL-LacZ</i>  | 0                                                                                    | 0                                                          | 13/13                                                                  | 90<br>100<br>90<br>95<br>98<br>100<br>100<br>100<br>97<br>97<br>88<br>99<br>97          | 96                                | 0                                                                    | 0                                                                                                                            | 0                                 | 3                                                                  |
| <i>RipCreER<sup>TM</sup>; LSL-LacZ</i>  | 0                                                                                    | 0                                                          | 7/7                                                                    | 98<br>100<br>100<br>97<br>98<br>85<br>60                                                | 91                                | 0                                                                    | 0                                                                                                                            | 0                                 | 2                                                                  |
| <i>RipCreER<sup>TM</sup>; LSL-LacZ</i>  | 0                                                                                    | 0                                                          | 10/10                                                                  | 99<br>99<br>99<br>88<br>98<br>98<br>95<br>99<br>100<br>97                               | 97                                | 0                                                                    | 0                                                                                                                            | 0                                 | 3                                                                  |
| <i>Pdx1CreER<sup>TM</sup>; LSL-LacZ</i> | a)50<br>b)85<br>c)60<br>d)80<br>e)90<br>f)85<br>g)50<br>h)75<br>i)85                 | 74                                                         | 8/8                                                                    | 80<br>80<br>99<br>85<br>90<br>85<br>80<br>98                                            | 87                                | 20/24                                                                | 50<br>50<br>50<br>100<br>70<br>75<br>100<br>50<br>80<br>100<br>100<br>50<br>80<br>100<br>85<br>100<br>50<br>100<br>100<br>80 | 79                                | 0                                                                  |
| <i>Pdx1CreER<sup>TM</sup>; LSL-LacZ</i> | a)95<br>b)100<br>c)95<br>d)98<br>e)80<br>f)50                                        | 86                                                         | 6/6                                                                    | 100<br>100<br>100<br>100<br>99<br>100                                                   | 99.8                              | 7/7                                                                  | 100<br>100<br>100<br>98<br>100<br>100<br>100<br>80                                                                           | 99.7                              | 0                                                                  |
| <i>Pdx1CreER<sup>TM</sup>; LSL-LacZ</i> | a)98<br>b)98<br>c)98<br>d)85<br>e)99<br>f)98<br>g)99<br>h)97<br>I)95<br>j)99<br>k)96 | 97                                                         | 20/20                                                                  | 30<br>85<br>100<br>90<br>98<br>95<br>90<br>85<br>95<br>95<br>60<br>80<br>90<br>80<br>90 | 87                                | 61/77                                                                | 16x0%<br>6x10%<br>2x5%<br>10x2%<br>15x100%<br>11x50%<br>4x30%<br>1x60%<br>6x80%<br>4x20%<br>2x90%                            | 50                                | 0                                                                  |

|                                             |                                                                                      |    |     |                            |    |       |                                                                 |    |   |
|---------------------------------------------|--------------------------------------------------------------------------------------|----|-----|----------------------------|----|-------|-----------------------------------------------------------------|----|---|
|                                             |                                                                                      |    |     | 97<br>90<br>97<br>98<br>95 |    |       |                                                                 |    |   |
| <i>proCPA1CreER<sup>fl2</sup>; LSL-LacZ</i> | a)45<br>b)30<br>c)50<br>d)70<br>e)90<br>f)40<br>g)35<br>h)40<br>i)40<br>j)30<br>k)70 | 49 | 4/4 | 50<br>90<br>100<br>100     | 85 | 10/19 | 100<br>100<br>100<br>10<br>50<br>100<br>100<br>50<br>100<br>100 | 81 | 0 |
| <i>proCPA1CreER<sup>fl2</sup>; LSL-LacZ</i> | a)40<br>b)40<br>c)35<br>d)60<br>e)0<br>f)45<br>g)40<br>h)50<br>i)0<br>j)70<br>k)75   | 41 | 1/1 | 80                         | 80 | 10/18 | 100<br>50<br>50<br>50<br>50<br>50<br>80<br>70<br>70<br>50       | 62 | 0 |
| <i>proCPA1CreER<sup>fl2</sup>; LSL-LacZ</i> | a)5<br>b)20<br>c)25<br>d)3<br>e)20<br>f)60<br>g)45<br>h)25<br>i)60<br>j)50           | 31 | 3/3 | 7<br>2<br>98               | 36 | 5/16  | 70<br>20<br>100<br>100<br>100                                   | 78 | 0 |

**Table S2: Quantification and characterization of pre neoplastic lesions and PDAC developed upon *Kras*<sup>G12D</sup> activation alone or in combination with p53 or Ink4A/Arf loss by *Pdx1CreER*<sup>TM</sup>**

| Mouse Genotype                                                                      | Treatment | N= | <i>Kras</i> <sup>G12D</sup> activation at post-natal age | Sacrificed #of days after the last TM injection | # of mice with 1-2x 1A lesions | # of mice with multiple 1A lesions | # of mice with 1-4x 1B lesions | # of mice with multiple 1B lesions | # of mice with 2-5 grade 2 lesions | # of mice with grade 3 lesions | mucinous/ non mucinous focal ductal metaplasia | # of mice with Ducts (DII)/ Acini in islets (AII) | # of mice with PDAC                         | Metastasis (met)/ invasion (i)            |
|-------------------------------------------------------------------------------------|-----------|----|----------------------------------------------------------|-------------------------------------------------|--------------------------------|------------------------------------|--------------------------------|------------------------------------|------------------------------------|--------------------------------|------------------------------------------------|---------------------------------------------------|---------------------------------------------|-------------------------------------------|
| <i>Pdx1CreER<sup>TM</sup>; LSL-Kras<sup>G12D</sup></i>                              | TM        | 2  | 14                                                       | 4, 7                                            | 0                              | 0                                  | 0                              | 0                                  | 0                                  | 0                              | N.A.                                           | 0                                                 | 0                                           | N.A                                       |
| <i>Pdx1CreER<sup>TM</sup>; LSL-Kras<sup>G12D</sup></i>                              | TM        | 3  | 14                                                       | 10                                              | 3                              | 0                                  | 0                              | 0                                  | 0                                  | 0                              | N.A                                            | 2x DII, 1x AII                                    | 0                                           | N.A                                       |
| <i>Pdx1CreER<sup>TM</sup>; LSL-Kras<sup>G12D</sup></i>                              | TM        | 2  | 14                                                       | 20                                              | 0                              | 0                                  | 0                              | 0                                  | 0                                  | 0                              | N.A                                            | 0                                                 | 0                                           | N.A                                       |
| <i>Pdx1CreER<sup>TM</sup>; LSL-Kras<sup>G12D</sup></i>                              | TM        | 3  | 14                                                       | 40                                              | 0                              | 3                                  | 1                              | 2                                  | 0                                  | 0                              | N.A                                            | 2x DII                                            | 0                                           | N.A                                       |
| <i>Pdx1CreER<sup>TM</sup>; LSL-Kras<sup>G12D</sup></i>                              | TM        | 3  | 14                                                       | 120                                             | 1                              | 2                                  | 0                              | 2                                  | 2                                  | 0                              | N.A                                            | 1x DII                                            | 0                                           | N.A                                       |
| <i>Pdx1CreER<sup>TM</sup>; LSL-Kras<sup>G12D</sup></i>                              | TM        | 1  | 21                                                       | 40                                              | 0                              | 1                                  | 0                              | 0                                  | 0                                  | 0                              | N.A                                            | 0                                                 | 0                                           | N.A                                       |
| <i>Pdx1CreER<sup>TM</sup>; LSL-Kras<sup>G12D</sup></i>                              | TM        | 1  | 24                                                       | 40                                              | 0                              | 1                                  | 1                              | 0                                  | 0                                  | 0                              | N.A                                            | 0                                                 | 0                                           | N.A                                       |
| <i>Pdx1CreER<sup>TM</sup>; LSL-Kras<sup>G12D</sup></i>                              | TM        | 2  | 27                                                       | 10                                              | 1                              | 0                                  | 0                              | 0                                  | 0                                  | 0                              | N.A                                            | 1x DII                                            | 0                                           | N.A                                       |
| <i>Pdx1CreER<sup>TM</sup>; LSL-Kras<sup>G12D</sup></i>                              | TM        | 4  | 27                                                       | 20                                              | 1                              | 0                                  | 0                              | 0                                  | 0                                  | 0                              | N.A                                            | 0                                                 | 0                                           | N.A                                       |
| <i>Pdx1CreER<sup>TM</sup>; LSL-Kras<sup>G12D</sup></i>                              | TM        | 1  | 27                                                       | 40                                              | 0                              | 0                                  | 0                              | 0                                  | 0                                  | 0                              | N.A                                            | 0                                                 | 0                                           | N.A                                       |
| <i>Pdx1CreER<sup>TM</sup>; LSL-Kras<sup>G12D</sup></i>                              | TM        | 2  | 27                                                       | 120                                             | 0                              | 2                                  | 1                              | 1                                  | 2                                  | 0                              | N.A                                            | 2x DII                                            | 0                                           | N.A                                       |
| <i>Pdx1CreER<sup>TM</sup>; LSL-Kras<sup>G12D</sup></i>                              | TM        | 1  | 27                                                       | 188                                             | 0                              | 1                                  | 0                              | 1                                  | 1                                  | 1                              | N.A                                            | 0                                                 | 1                                           | N.A                                       |
| <i>Pdx1CreER<sup>TM</sup>; LSL-Kras<sup>G12D</sup></i>                              | TM        | 2  | 56                                                       | 10                                              | 1                              | 0                                  | 0                              | 0                                  | 0                                  | 0                              | N.A                                            | 0                                                 | 0                                           | N.A                                       |
| <i>Pdx1CreER<sup>TM</sup>; LSL-Kras<sup>G12D</sup></i>                              | TM        | 2  | 56                                                       | 20                                              | 1                              | 0                                  | 0                              | 0                                  | 0                                  | 0                              | N.A                                            | 0                                                 | 0                                           | N.A                                       |
| <i>Pdx1CreER<sup>TM</sup>; LSL-Kras<sup>G12D</sup></i>                              | TM        | 1  | 56                                                       | 40                                              | 0                              | 1                                  | 1                              | 0                                  | 0                                  | 0                              | N.A                                            | 0                                                 | 0                                           | N.A                                       |
| <i>Pdx1CreER<sup>TM</sup>; LSL-Kras<sup>G12D</sup></i>                              | TM        | 2  | 56                                                       | 120                                             | 0                              | 1                                  | 1                              | 0                                  | 0                                  | 0                              | N.A                                            | 0                                                 | 0                                           | N.A                                       |
| <i>Pdx1CreER<sup>TM</sup>; LSL-Kras<sup>G12D</sup></i>                              | Corn oil  | 5  | 14                                                       | 5, 10, 20, 40, 120                              | 0                              | 0                                  | 0                              | 0                                  | 0                                  | 0                              | N.A                                            | 0                                                 | 0                                           | N.A                                       |
| <i>Pdx1CreER<sup>TM</sup>; LSL-Kras<sup>G12D</sup></i>                              | Corn oil  | 5  | 27                                                       | 5, 10, 20, 40, 120                              | 0                              | 0                                  | 0                              | 0                                  | 0                                  | 0                              | N.A                                            | 0                                                 | 0                                           | N.A                                       |
| <i>Pdx1CreER<sup>TM</sup>; LSL-Kras<sup>G12D</sup></i>                              | Corn oil  | 5  | 56                                                       | 5, 10, 20, 40, 120                              | 0                              | 0                                  | 0                              | 0                                  | 0                                  | 0                              | N.A                                            | 0                                                 | 0                                           | N.A                                       |
| <i>Pdx1CreER<sup>TM</sup>; LSL-Kras<sup>G12D</sup>; Trp53<sup>fllox/fllox</sup></i> | TM        | 6  | 22<br>23<br>22<br>22                                     | 18<br>57<br>40<br>60                            | 0                              | 3                                  | 1                              | 2                                  | 4                                  | 4                              | 2x non mucinous                                | 2x DII                                            | 2x MD to PD<br>1x PD with S<br>1x PD with A | 3x SI(i)<br>1x spleen and Diaphragm (met) |

|                                                                                                                  |    |   |                                  |                                  |   |   |   |   |   |   |                 |   |                                                       |                             |
|------------------------------------------------------------------------------------------------------------------|----|---|----------------------------------|----------------------------------|---|---|---|---|---|---|-----------------|---|-------------------------------------------------------|-----------------------------|
|                                                                                                                  |    |   | 23                               | 30                               |   |   |   |   |   |   |                 |   |                                                       |                             |
|                                                                                                                  |    |   | 23                               | 37                               |   |   |   |   |   |   |                 |   |                                                       |                             |
| <i>Pdx1CreER<sup>TM</sup>; LSL-Kras<sup>G12D</sup>; Trp53<sup>fllox/flox</sup>; Luciferase<sup>fllox/+</sup></i> | TM | 6 | 24<br>23<br>23<br>23<br>26<br>54 | 20<br>45<br>45<br>45<br>79<br>30 | 2 | 2 | 4 | 1 | 5 | 3 | 2x non mucinous | 0 | 3x Poor diff<br>1x PD with A<br>1x PD with S<br>and A | 1x SI (i)<br>1x stomach (i) |
| <i>Pdx1CreER<sup>TM</sup>; LSL-Kras<sup>G12D</sup>; Ink4A/Arf<sup>fllox/flox</sup></i>                           | TM | 1 | 28                               | 36                               | 0 | 1 | 1 | 0 | 1 | 1 | 0               | 0 | 1x PD with S<br>and A                                 | 1x SI (i)                   |

N.A. not applicable

**Table S3: Quantification and characterization of pre neoplastic lesions and PDAC developed upon *Kras<sup>G12D</sup>* activation alone or in combination with p53 or Ink4A/Arf loss by *RipCreER<sup>TM</sup>* and *proCPAICreER<sup>T2</sup>***

| Mouse Genotype                                                                            | Treatment | N= | <i>Kras<sup>G12D</sup></i> activation at post-natal age | Sacrificed #of days after the last TM injection | # of mice with 1-2x 1A lesions | # of mice with multiple 1A lesions | # of mice with 1-4x 1B lesions | # of mice with multiple 1B lesions | # of mice with 2-4 grade 2 lesions | # of mice with grade 3 lesions | # of mice with Ducts (DII)/ Acini in islets (AII) | # of mice with PDAC                     | Metastasis (met)/ invasion (i)      | <i>K-ras</i> recombination tested by PCR/confirmed |
|-------------------------------------------------------------------------------------------|-----------|----|---------------------------------------------------------|-------------------------------------------------|--------------------------------|------------------------------------|--------------------------------|------------------------------------|------------------------------------|--------------------------------|---------------------------------------------------|-----------------------------------------|-------------------------------------|----------------------------------------------------|
| <i>proCPAICreER<sup>T2</sup>; LSL-Kras<sup>G12D</sup></i>                                 | TM        | 6  | 14                                                      | 5, 10, 20, 40, 126, 240                         | 0                              | 0                                  | 0                              | 0                                  | 0                                  | 0                              | 0                                                 | 0                                       |                                     | YES/YES                                            |
| <i>proCPAICreER<sup>T2</sup>; LSL-Kras<sup>G12D</sup></i>                                 | TM        | 1  | 14                                                      | 120                                             | 1                              | 0                                  | 0                              | 0                                  | 0                                  | 0                              | 0                                                 | 0                                       |                                     | YES/YES                                            |
| <i>proCPAICreER<sup>T2</sup>; LSL-Kras<sup>G12D</sup></i>                                 | TM        | 4  | 23                                                      | 5, 20, 40, 240                                  | 0                              | 0                                  | 0                              | 0                                  | 0                                  | 0                              | 0                                                 | 0                                       |                                     | YES/YES                                            |
| <i>proCPAICreER<sup>T2</sup>; LSL-Kras<sup>G12D</sup></i>                                 | TM        | 1  | 23                                                      | 151                                             | 1                              | 0                                  | 0                              | 0                                  | 0                                  | 0                              | 0                                                 | 0                                       |                                     | YES/YES                                            |
| <i>proCPAICreER<sup>T2</sup>; LSL-Kras<sup>G12D</sup></i>                                 | TM        | 4  | 26                                                      | 20, 40, 126, 219                                | 0                              | 0                                  | 0                              | 0                                  | 0                                  | 0                              | 0                                                 | 0                                       |                                     | YES/YES                                            |
| <i>proCPAICreER<sup>T2</sup>; LSL-Kras<sup>G12D</sup></i>                                 | TM        | 2  | 27                                                      | 26                                              | 0                              | 0                                  | 0                              | 0                                  | 0                                  | 0                              | 0                                                 | 0                                       |                                     | YES/YES                                            |
| <i>proCPAICreER<sup>T2</sup>; LSL-Kras<sup>G12D</sup></i>                                 | TM        | 1  | 30                                                      | 14                                              | 0                              | 0                                  | 0                              | 0                                  | 0                                  | 0                              | 0                                                 | 0                                       |                                     | YES/YES                                            |
| <i>proCPAICreER<sup>T2</sup>; LSL-Kras<sup>G12D</sup></i>                                 | TM        | 1  | 51                                                      | 40                                              | 0                              | 0                                  | 0                              | 0                                  | 0                                  | 0                              | 0                                                 | 0                                       |                                     | YES/YES                                            |
| <i>proCPAICreER<sup>T2</sup>; LSL-Kras<sup>G12D</sup></i>                                 | corn-oil  | 4  | 14                                                      | 5,10, 40, 120                                   | 0                              | 0                                  | 0                              | 0                                  | 0                                  | 0                              | 0                                                 | 0                                       |                                     | YES/NO                                             |
| <i>proCPAICreER<sup>T2</sup>; LSL-Kras<sup>G12D</sup></i>                                 | corn-oil  | 4  | 26                                                      | 5,20, 40, 120                                   | 0                              | 0                                  | 0                              | 0                                  | 0                                  | 0                              | 0                                                 | 0                                       |                                     | YES/NO                                             |
| <i>proCPAICreER<sup>T2</sup>; LSL-Kras<sup>G12D</sup></i>                                 | corn-oil  | 1  | 56                                                      | 40                                              | 0                              | 0                                  | 0                              | 0                                  | 0                                  | 0                              | 0                                                 | 0                                       |                                     | YES/NO                                             |
| <i>proCPAICreER<sup>T2</sup>; LSL-Kras<sup>G12D</sup>; Trp53<sup>fllox/flox</sup></i>     | TM        | 5  | 14<br>14<br>28<br>53<br>53                              | 46<br>97<br>67<br>81<br>81                      | 0                              | 0                                  | 0                              | 0                                  | 0                                  | 0                              | 0                                                 | 1x MD to PD with undifferentiated areas | 1X SI (i) liver and diaphragm (met) | YES/YES                                            |
| <i>proCPAICreER<sup>T2</sup>; LSL-Kras<sup>G12D</sup>; Ink4A/Arf<sup>fllox/flox</sup></i> | TM        | 7  | 14<br>14<br>25<br>25<br>15<br>20<br>35                  | 113<br>188<br>158<br>309<br>50<br>50<br>83      | 0                              | 0                                  | 0                              | 0                                  | 0                                  | 0                              | 0                                                 | 0                                       |                                     | YES/YES                                            |
| <i>RipCreER<sup>TM</sup>; LSL-Kras<sup>G12D</sup></i>                                     | TM        | 5  | 14                                                      | 6, 22, 40, 55                                   | 0                              | 0                                  | 0                              | 0                                  | 0                                  | 0                              | 0                                                 | 0                                       |                                     | YES/YES                                            |
| <i>RipCreER<sup>TM</sup>; LSL-Kras<sup>G12D</sup></i>                                     | TM        | 2  | 15                                                      | 22, 40                                          | 0                              | 0                                  | 0                              | 0                                  | 0                                  | 0                              | 0                                                 | 0                                       |                                     | YES/YES                                            |
| <i>RipCreER<sup>TM</sup>; LSL-Kras<sup>G12D</sup></i>                                     | TM        | 3  | 18                                                      | 9, 40, 120                                      | 0                              | 0                                  | 0                              | 0                                  | 0                                  | 0                              | 0                                                 | 0                                       |                                     | YES/YES                                            |
| <i>RipCreER<sup>TM</sup>; LSL-Kras<sup>G12D</sup></i>                                     | TM        | 2  | 20                                                      | 40, 65                                          | 0                              | 0                                  | 0                              | 0                                  | 0                                  | 0                              | 0                                                 | 0                                       |                                     | YES/YES                                            |
| <i>RipCreER<sup>TM</sup>; LSL-Kras<sup>G12D</sup></i>                                     | TM        | 1  | 24                                                      | 40                                              | 0                              | 0                                  | 0                              | 0                                  | 0                                  | 0                              | 0                                                 | 0                                       |                                     | YES/YES                                            |
| <i>RipCreER<sup>TM</sup>; LSL-Kras<sup>G12D</sup></i>                                     | TM        | 1  | 25                                                      | 150                                             | 0                              | 0                                  | 0                              | 0                                  | 0                                  | 0                              | 0                                                 | 0                                       |                                     | YES/YES                                            |
| <i>RipCreER<sup>TM</sup>; LSL-Kras<sup>G12D</sup></i>                                     | TM        | 1  | 28                                                      | 40                                              | 0                              | 0                                  | 0                              | 0                                  | 0                                  | 0                              | 0                                                 | 0                                       |                                     | YES/YES                                            |
| <i>RipCreER<sup>TM</sup>; LSL-Kras<sup>G12D</sup></i>                                     | TM        | 7  | 29                                                      | 10, 20, 40, 120                                 | 0                              | 0                                  | 0                              | 0                                  | 0                                  | 0                              | 0                                                 | 0                                       |                                     | YES/YES                                            |
| <i>RipCreER<sup>TM</sup>; LSL-Kras<sup>G12D</sup></i>                                     | TM        | 3  | 35                                                      | 70, 164                                         | 0                              | 0                                  | 0                              | 0                                  | 0                                  | 0                              | 0                                                 | 0                                       |                                     | YES/YES                                            |
| <i>RipCreER<sup>TM</sup>; LSL-Kras<sup>G12D</sup></i>                                     | TM        | 2  | 36                                                      | 145, 240                                        | 0                              | 0                                  | 0                              | 0                                  | 0                                  | 0                              | 0                                                 | 0                                       |                                     | YES/YES                                            |
| <i>RipCreER<sup>TM</sup>; LSL-Kras<sup>G12D</sup></i>                                     | TM        | 3  | 56                                                      | 10, 20, 120                                     | 0                              | 0                                  | 0                              | 0                                  | 0                                  | 0                              | 0                                                 | 0                                       |                                     | YES/YES                                            |
| <i>RipCreER<sup>TM</sup>; LSL-Kras<sup>G12D</sup></i>                                     | corn-oil  | 4  | 14                                                      | 5, 10, 20, 120                                  | 0                              | 0                                  | 0                              | 0                                  | 0                                  | 0                              | 0                                                 | 0                                       |                                     | YES/NO                                             |
| <i>RipCreER<sup>TM</sup>; LSL-Kras<sup>G12D</sup></i>                                     | corn-oil  | 5  | 27                                                      | 5, 10, 20, 30, 120                              | 0                              | 0                                  | 0                              | 0                                  | 0                                  | 0                              | 0                                                 | 0                                       |                                     | YES/NO                                             |
| <i>RipCreER<sup>TM</sup>; LSL-Kras<sup>G12D</sup></i>                                     | corn-oil  | 3  | 56                                                      | 5, 10, 20                                       | 0                              | 0                                  | 0                              | 0                                  | 0                                  | 0                              | 0                                                 | 0                                       |                                     | YES/NO                                             |



|                                                                                        |    |   |                                              |                                                    |   |   |   |   |   |   |   |   |   |   |   |         |
|----------------------------------------------------------------------------------------|----|---|----------------------------------------------|----------------------------------------------------|---|---|---|---|---|---|---|---|---|---|---|---------|
| <i>RipCreER<sup>TM</sup>; LSL-Kras<sup>G12D</sup>; Ink4A/Arf<sup>fllox/fllox</sup></i> | TM | 9 | 14<br>15<br>15<br>20<br>29<br>29<br>35<br>35 | 10<br>22<br>80<br>80<br>60<br>22<br>22<br>70<br>70 | 0 | 0 | 0 | 0 | 0 | 0 | 0 | 0 | 0 | 0 | 0 | YES/YES |
| <i>RipCreER<sup>TM</sup>; LSL-Kras<sup>G12D</sup>; Trp53<sup>fllox/fllox</sup></i>     | TM | 5 | 28<br>28<br>31<br>31<br>31                   | 90<br>27<br>10<br>20<br>42                         | 0 | 0 | 0 | 0 | 0 | 0 | 0 | 0 | 0 | 0 | 0 | YES/YES |

**Table S4: Quantification and characterization of chronic pancreatitis and Kras<sup>G12D</sup>-induced pre neoplastic lesions and PDAC**

| Mouse Genotype                                                                                       | Treatment      | N= | Kras <sup>G12D</sup> activation at post-natal age | Sacrificed # of days after first TM injection | caerulein for a total of N days     | # of mice with 1-2x 1A lesions | # of mice with multiple 1A lesions | # of mice with 1-4x 1B lesions | # of mice with multiple 1B lesions | # of mice with 2-4 grade 2 lesions or more (m) | # of mice with grade 3 lesions | mucinous (m)/ non mucinous (nm) focal ductal metaplasia | # of mice with Ducts (DII)/Acini in islets (AII) | # of mice with PDAC                           | metastasis (met)/ invasion (i)                                             | K-ras recombination tested by PCR/confirmed |
|------------------------------------------------------------------------------------------------------|----------------|----|---------------------------------------------------|-----------------------------------------------|-------------------------------------|--------------------------------|------------------------------------|--------------------------------|------------------------------------|------------------------------------------------|--------------------------------|---------------------------------------------------------|--------------------------------------------------|-----------------------------------------------|----------------------------------------------------------------------------|---------------------------------------------|
| <i>proCPA1CreER<sup>T2</sup>; LSL-Kras<sup>G12D</sup></i>                                            | caerulein + TM | 6  | 60<br>60<br>60<br>60<br>90                        | 9<br>34<br>34<br>34<br>163                    | 44<br>69<br>69<br>69<br>193         | 0                              | 1                                  | 0                              | 0                                  | 0                                              | 0                              | 0                                                       | 1x DII                                           | 0                                             |                                                                            | YES/YES                                     |
| <i>proCPA1CreER<sup>T2</sup>; LSL-Kras<sup>G12D</sup>; LSL-LacZ</i>                                  | caerulein + TM | 3  | 59<br>63<br>64                                    | 86<br>33<br>90                                | 121<br>66<br>125                    | 0                              | 2                                  | 0                              | 2                                  | 0                                              | 0                              | 2x m and nm                                             | 0                                                | 0                                             |                                                                            | YES/YES                                     |
| <i>proCPA1CreER<sup>T2</sup>; LSL-Kras<sup>G12D</sup>; Trp53<sup>fllox/fllox</sup></i>               | caerulein + TM | 6  | 52<br>52<br>52<br>50<br>26<br>99                  | 3<br>57<br>71<br>78<br>140<br>9               | 38<br>81<br>106<br>105<br>175<br>44 | 0                              | 3                                  | 0                              | 3                                  | 3                                              | 0                              | 3x m and nm                                             | 0                                                | 2x PD<br>1x Well to PD                        | abdominal wall (i)                                                         | YES/YES                                     |
| <i>proCPA1CreER<sup>T2</sup>; LSL-Kras<sup>G12D</sup>; Ink4A/Arf<sup>fllox/fllox</sup></i>           | TM + caerulein | 1  | 25                                                | 151                                           | 95                                  | 0                              | 1                                  | 0                              | 0                                  | 0                                              | 0                              | 0                                                       | 0                                                | 1X PD with S                                  | Spleen surface, Kidney surface, Diaphragm (mets)                           | YES/YES                                     |
| <i>proCPA1CreER<sup>T2</sup>; LSL-Kras<sup>G12D</sup>; LSL-LacZ</i>                                  | TM + caerulein | 2  | 25<br>33                                          | 50<br>52                                      | 81<br>38                            | 0                              | 0                                  | 0                              | 0                                  | 0                                              | 0                              | 1x nm                                                   | 0                                                | 0                                             |                                                                            | YES/YES                                     |
| <i>proCPA1CreER<sup>T2</sup>; LSL-Kras<sup>G12D</sup>; Ink4A/Arf<sup>fllox/fllox</sup>; LSL-LacZ</i> | TM + caerulein | 1  | 33                                                | 52                                            | 38                                  | 0                              | 0                                  | 0                              | 0                                  | 0                                              | 0                              | 1x nm                                                   | 0                                                | 0                                             |                                                                            | YES/YES                                     |
| <i>RipCreER<sup>TM</sup>; LSL-Kras<sup>G12D</sup>; LSL-LacZ</i>                                      | caerulein + TM | 2  | 197<br>87                                         | 58<br>57                                      | 89<br>84                            | 0                              | 1                                  | 0                              | 0                                  | 0                                              | 0                              | 2x nm                                                   | 0                                                | 0                                             |                                                                            | YES/YES                                     |
| <i>RipCreER<sup>TM</sup>; LSL-Kras<sup>G12D</sup>; Ink4A/Arf<sup>fllox/fllox</sup></i>               | caerulein + TM | 1  | 55                                                | 23                                            | 78                                  | 0                              | 1                                  | 0                              | 1                                  | 0                                              | 0                              | 1x nm                                                   | 0                                                | 0                                             |                                                                            | YES/YES                                     |
| <i>RipCreER<sup>TM</sup>; LSL-Kras<sup>G12D</sup>; Ink4A/Arf<sup>fllox/fllox</sup>; LSL-LacZ</i>     | caerulein + TM | 5  | 55<br>54<br>54<br>54<br>30                        | 1<br>9<br>9<br>39<br>9                        | 33<br>41<br>41<br>72<br>44          | 2                              | 3                                  | 0                              | 2                                  | 1                                              | 0                              | 5                                                       | 1x AII                                           | 0                                             |                                                                            | YES/YES                                     |
| <i>RipCreER<sup>TM</sup>; LSL-Kras<sup>G12D</sup>; Trp53<sup>fllox/fllox</sup>; LSL-LacZ</i>         | caerulein + TM | 3  | 55<br>55<br>56                                    | 71<br>71<br>53                                | 104<br>104<br>88                    | 0                              | 3                                  | 1                              | 2                                  | 1                                              | 0                              | 1x m and nm                                             | 0                                                | 2x PD with S and A<br>1x undifferentiated (S) | 1x Abdominal wall (met)<br>1x lung (met)                                   | YES/YES                                     |
| <i>RipCreER<sup>TM</sup>; LSL-Kras<sup>G12D</sup></i>                                                | TM + caerulein | 1  | 29                                                | 31                                            | 17                                  | 1                              | 0                                  | 0                              | 0                                  | 0                                              | 0                              | 1x nm                                                   | 0                                                | 0                                             |                                                                            | YES/YES                                     |
| <i>RipCreER<sup>TM</sup>; LSL-Kras<sup>G12D</sup>; LSL-LacZ</i>                                      | TM + caerulein | 6  | 22<br>31<br>31<br>51<br>51<br>51                  | 99<br>23<br>78<br>60<br>114<br>106            | 88<br>9<br>65<br>53<br>101<br>93    | 0                              | 4                                  | 2                              | 2                                  | 1                                              | 1                              | 3x nm and 3x m and nm                                   | 0                                                | 2x PD+ undifferentiated (S)                   | Diaphragm, Liver border, Peritoneal adipose tissue and Small intestine (i) | YES/YES                                     |
| <i>RipCreER<sup>TM</sup>; LSL-Kras<sup>G12D</sup>; Trp53<sup>fllox/fllox</sup>; LSL-LacZ</i>         | TM + caerulein | 4  | 21<br>24<br>24<br>24                              | 65<br>67<br>67<br>82                          | 51<br>52<br>52<br>42                | 1                              | 3                                  | 3                              | 0                                  | 3 x(m)                                         | 1                              | 1x nm+m<br>1x nm                                        | 0                                                | 3x undifferentiated with S<br>1x PD+          | Small intestine (i) diaphragm (met)                                        | YES/YES                                     |



**Table S8: PCR Primers used in the study**

| Purpose                                                         | Primer ID                          | Sequence 5'-3'                                                                                                          | Product sizes                                                                                                                                                                                                                              |
|-----------------------------------------------------------------|------------------------------------|-------------------------------------------------------------------------------------------------------------------------|--------------------------------------------------------------------------------------------------------------------------------------------------------------------------------------------------------------------------------------------|
| <i>Cre</i> genotype (for all Cre recombinase harboring strains) | SageF<br>SageR                     | TGCTGTA CTGGTTATGCGG<br>TTGCCCTGTTCACTATCCAG                                                                            | 700-bp                                                                                                                                                                                                                                     |
| <i>LSL-Kras<sup>G12D</sup></i> genotype                         | Dt5'JKNew<br>UniJKNew<br>SD5'JKNew | GTCGACAAGCTCATGCGGG<br>CGCAGACTGTAGAGCAGCG<br>CCATGGCTTGAGTAAGTCTGC                                                     | Wild-type, 1Lox - <i>Kras<sup>G12D</sup></i> alleles : 500-bp and 550-bp, respectively                                                                                                                                                     |
| <i>Trp53<sup>lox</sup></i> genotype                             | A<br>B<br>C<br>D                   | CACAAAAACAGGTAAACCCAG<br>AGCACATAGGAGGCAGAGAC<br>AAGGGGTATGAGGGACAAGG<br>GAAGACAGAAAAGGGGAGGG                           | A+B :Wild-type and mutant alleles: 288-bp and 379-bp, respectively<br>C+D: Wild-type and mutant alleles: 431-bp and 584-bp, respectively                                                                                                   |
| <i>Ink4A/Arf<sup>lox</sup></i> genotype                         | INK20<br>INK21<br>KO3<br>KO4       | GTTTCCATTGCGAGGCTGCTCCGTAAGC<br>CTTTAGGGCGTTCTTTCCCACTTCTGC<br>GGTACTGCCGGCCCTTTGAGGGGA<br>CCATCCCCICAAGAGGCCCGGCAGTACC | INK20+INK21: Wild-type and mutant alleles: 150-bp and 250-bp, respectively<br>INK20+KO4: Wild-type and mutant alleles: no product and 177-bp, respectively<br>INK21+KO3: Wild-type and mutant alleles: no product and 130-bp, respectively |
| <i>R26-LSL-LacZ</i> genotype                                    | UnivF<br>WtR<br>MutR               | AAAGTCGCTCTGAGTTGTTAT<br>GGAGCGGGAGAAATGGATATG<br>GCCAAGAGTTTGTCCTCAACC                                                 | Wild-type and mutant alleles : 500-bp and 250-bp, respectively                                                                                                                                                                             |
| Recombined <i>LSL-Kras<sup>G12D</sup></i>                       | KrasF1<br>KrasR1<br>KrasSD5'       | GTCTTTCCCCAGCAGAGTGC<br>CTCTGCCTACGCCACCAGCTC<br>AGCTAGCCACCATGGCTTGAGTAAGTCTGCA                                        | Wild-type K-ras, 2Lox and 1Lox -K-ras <sup>G12D</sup> alleles : 620-bp, 510-bp and ~1100-bp, respectively                                                                                                                                  |
